# Supplementary material for: Improving Interlayer Adhesion of 3D Printed PLA/PCL Blends Using Triblock Copolymers
Source: Research Square preprint supplement (doi:10.21203/rs.3.rs-8396441/v1), 2026-01-14
Supplement: Supplementary file 1 [file e33ca2600d564b3617bf415f.docx]

**Supporting Information**

**Improving Interlayer Adhesion of 3D Printed PLA/PCL Blends Using Triblock Copolymers**

### 1H-NMR Spectroscopy


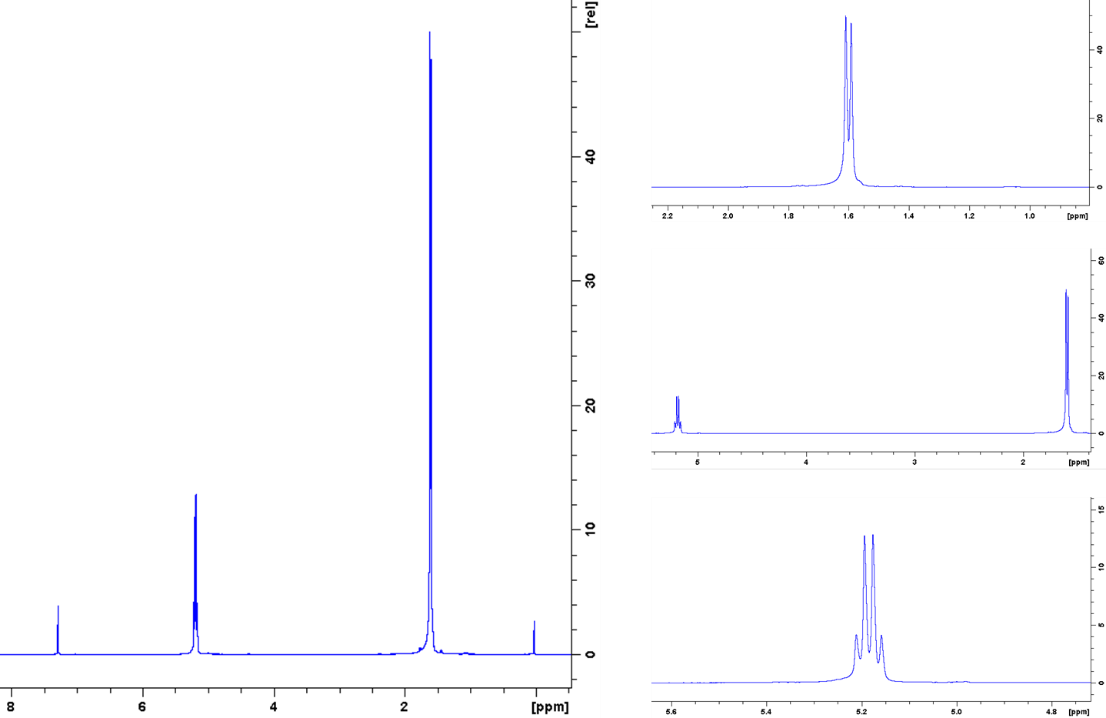


Figure 1S. 1H-NMR test results for commercial 4032D PLA (ppm).

### Filaments preparation


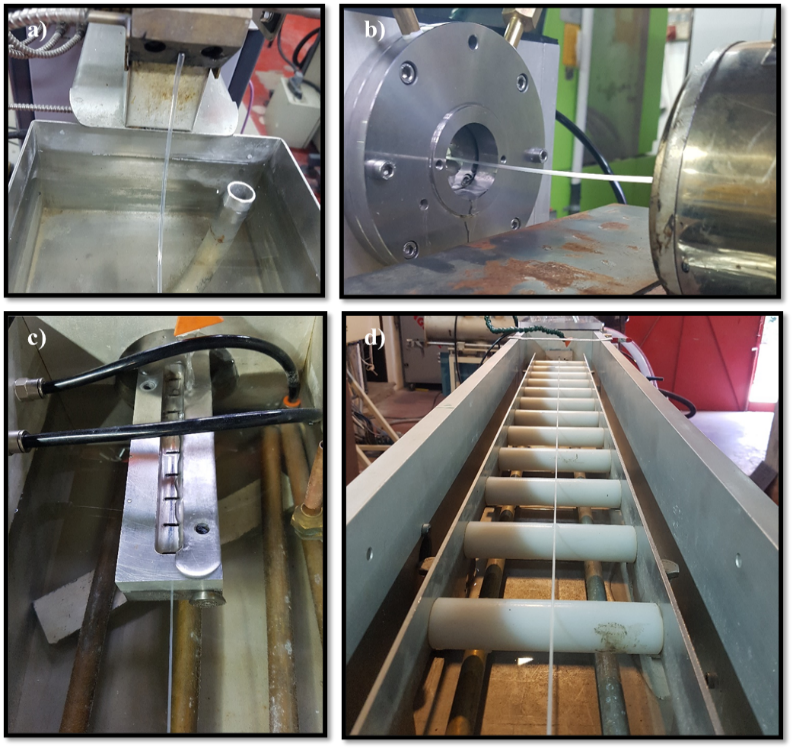


Figure 2S. Filament extrusion executed by a single screw extruder equipped with downstream components for filament production.

#### 3D Printing


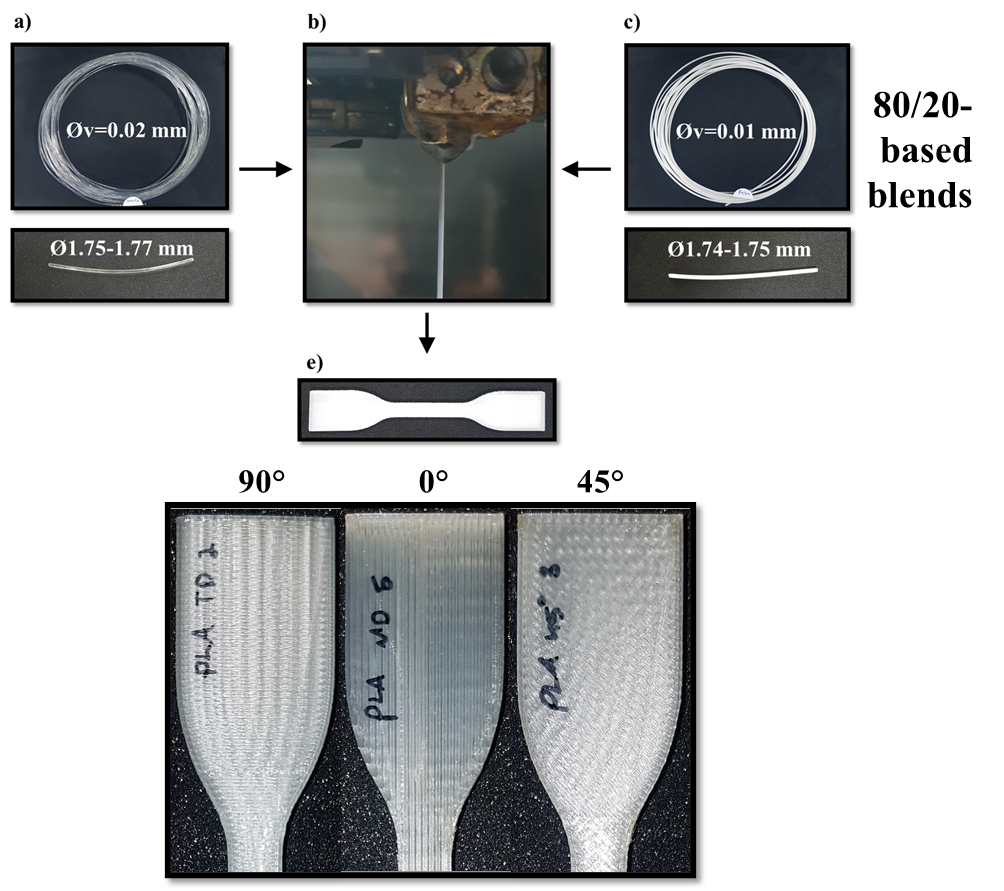


**d)**

**e)**

Figure 3S. The measured filament diameter and its variation for (a) PLA and (c) 80/20 w/w-based filaments. (b) filament emerges from the 3D printing nozzle. (d) 3D printed dogbone for tensile strength and toughness from PLA. (e) PLA dogbone printed in different orientations.

### Mechanical Properties


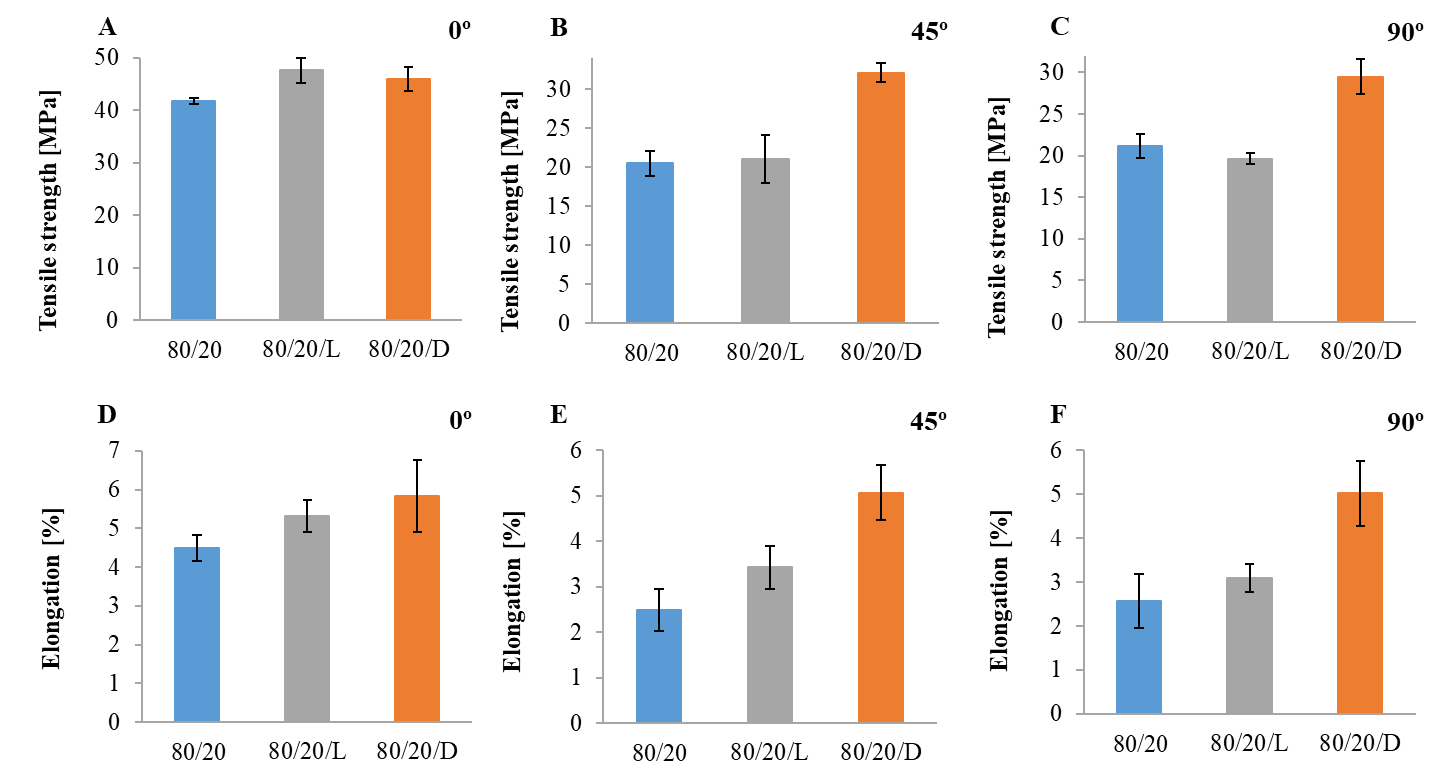


Figure 4S. Tensile strength and elongation at break of 80/20, 80/20/L and 80/20/D blends printed at different orientations (A+D) 0º, (B+E) 45º and (C+F) 90º.

Fracture mechanics


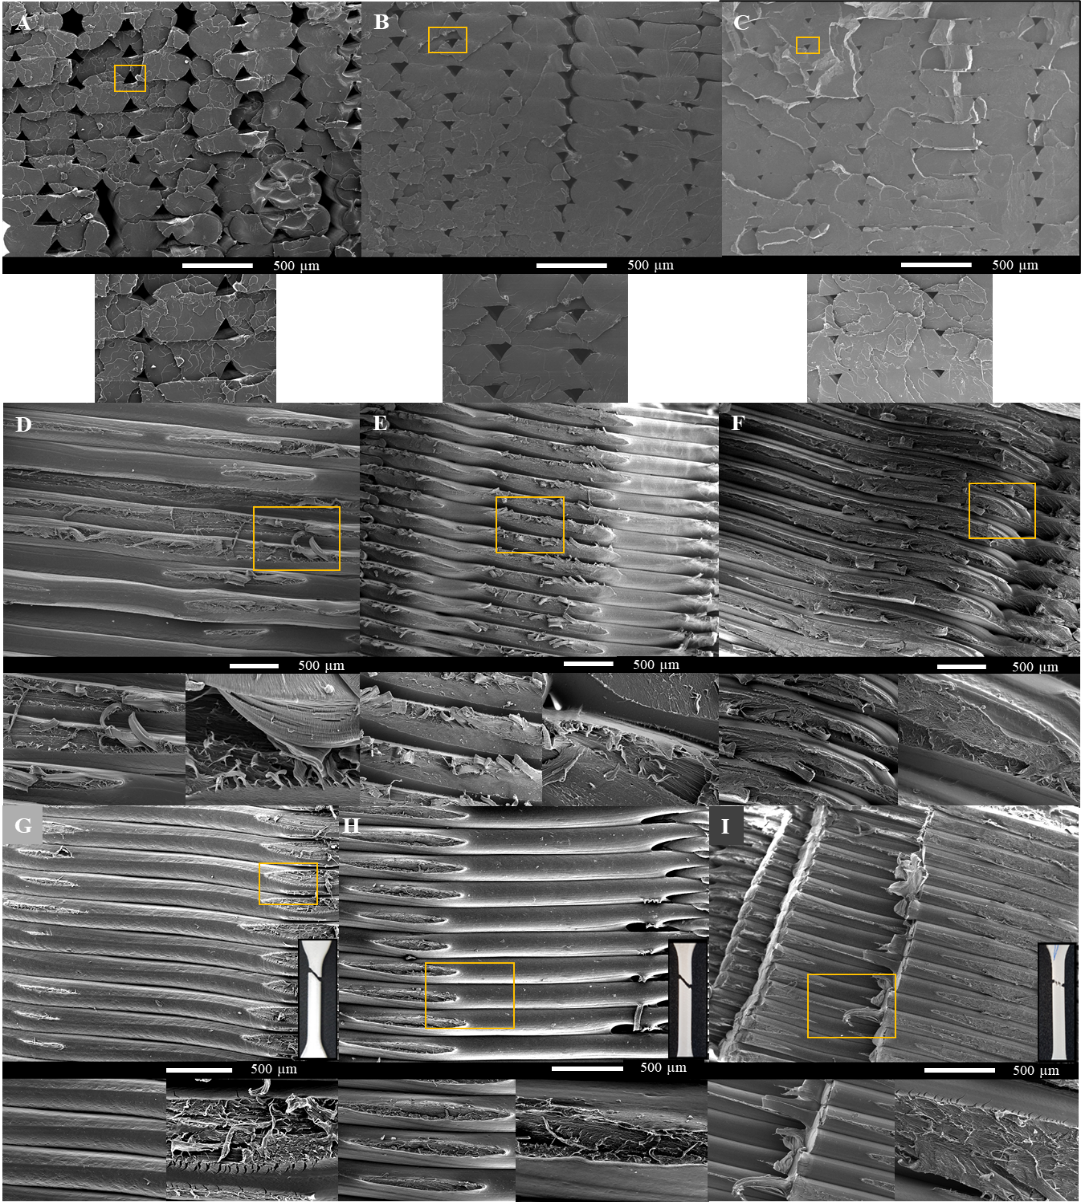


**Figure 5S.** SEM imaging of (A-C) section area of 0º printed specimens, (D-F) section area of 90º printed specimens and (G-I) section area of 45º printed specimens, when (A,D,G) 80/20 w/w PLA/PCL, (B,E,H) 80/20/L and (C,F,I) 80/20/D.
